# Supplementary material for: Synthesis, characterization, and photophysical properties of novel ball-type dinuclear and mononuclear containing four 1,1′-binaphthyl-8,8′-diol bridged metallophthalocyanines with long triplet state lifetimes
Source: Royal Society of Chemistry journal article supplement (doi:10.1039/c0dt01749c), 2011-01-01
Supplement: c0dt01749c.pdf [file c0dt01749c.pdf]

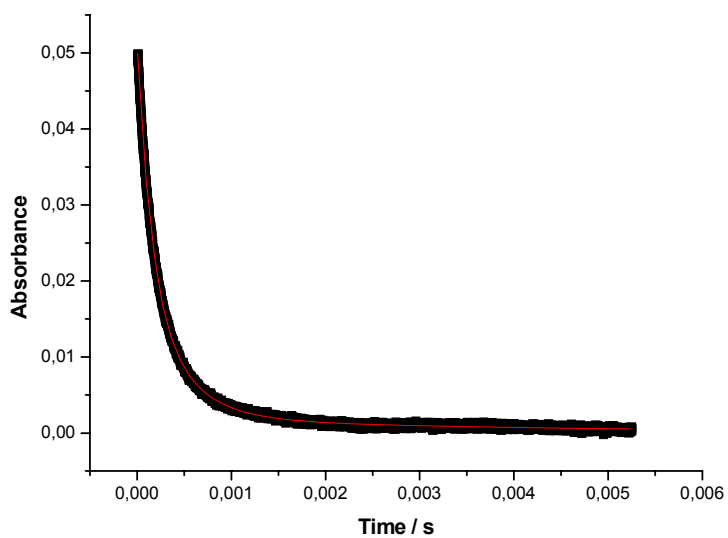

### Complex 7

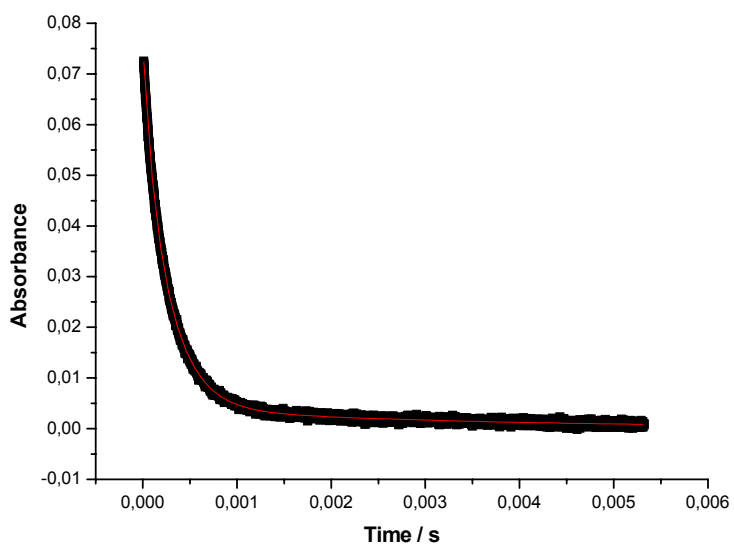

### Complex 8

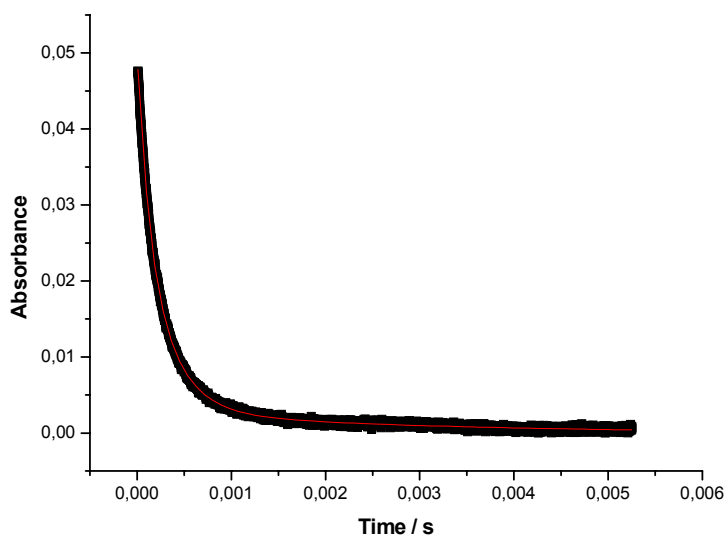

### Complex 9

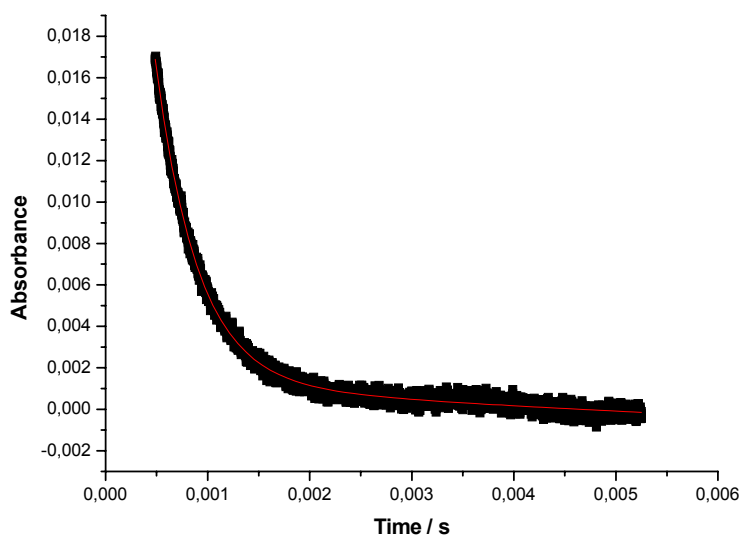

### Complex 11

Figure 3. Bi-exponential triplet decay curve for complex 7, 8, 9 and 11 in DMSO
